# Supplementary material
Source: PubMed Central journal article supplement (PMC3962541)
Supplement: epi-9-308-s01.pdf [file epi-9-308-s01.pdf]

## **Supplemental Material to:**

**Priscilla Brebi, Leonel Maldonado, Maartje G Noordhuis, Carmen Ili, Pamela Leal, Patricia Garcia, Mariana Brait, Judith Ribas, Christina Michailidi, Jimena Perez, Ethan Soudry, Oscar Tapia, Pablo Guzman, Sergio Muñoz, Leander Van Neste, Wim Van Criekinge, Rafael Irizarry, David Sidransky, Juan C Roa, and Rafael Guerrero-Preston**

**Genome-wide methylation profiling reveals Zinc finger protein 516 (ZNF516) and FK-506-binding protein 6 (FKBP6) promoters frequently methylated in cervical neoplasia, associated with HPV status and ethnicity in a Chilean population**

**Epigenetics 2013; 9(2)**

**<http://dx.doi.org/10.4161/epi.27120>**

**[http://www.landesbioscience.com/journals/epigenetics/  
article/27120/](http://www.landesbioscience.com/journals/epigenetics/article/27120/)**

**Supplementary Table 1.** Characteristics of patients that participated in the study

|                    | <b>Overall</b><br>n=294 |       | <b>Normal</b><br>n=37 |       | <b>CIN</b><br>n=137 |       | <b>Cancer</b><br>n=120 |       |
|--------------------|-------------------------|-------|-----------------------|-------|---------------------|-------|------------------------|-------|
| <b>Age</b>         |                         |       |                       |       |                     |       |                        |       |
| Median             | 41                      |       | 39                    |       | 36                  |       | 51                     |       |
| Range              | 18-86                   |       | 18-79                 |       | 18-68               |       | 23-86                  |       |
|                    | <i>n</i>                | (%)   | <i>n</i>              | (%)   | <i>n</i>            | (%)   | <i>n</i>               | (%)   |
| <b>Ethnicity</b>   |                         |       |                       |       |                     |       |                        |       |
| Non-Mapuche        | 223                     | (76%) | 22                    | (59%) | 112                 | (82%) | 89                     | (74%) |
| Mapuche            | 71                      | (24%) | 15                    | (41%) | 25                  | (18%) | 31                     | (26%) |
| <b>HPV</b>         |                         |       |                       |       |                     |       |                        |       |
| Not detected       | 60                      | (20%) | 34                    | (92%) | 17                  | (12%) | 9                      | (8%)  |
| Positive           | 234                     | (80%) | 3                     | (8%)  | 120                 | (88%) | 111                    | (93%) |
| <b>HPV subtype</b> |                         |       |                       |       |                     |       |                        |       |
| HPV 16             | 155                     | (53%) | 1                     | (3%)  | 70                  | (51%) | 84                     | (70%) |
| HPV 18             | 52                      | (18%) | 0                     | (0%)  | 25                  | (18%) | 27                     | (23%) |
| Other HPV type     | 71                      | (24%) | 2                     | (5%)  | 45                  | (33%) | 24                     | (20%) |

CIN=cervical epithelial neoplasia

**Supplementary Table 2.** Age, ethnicity and HPV status of patients selected for MeDIP-chip

|                    | <b>Normal</b><br>n=12 |        | <b>Cancer</b><br>n=7 |        |
|--------------------|-----------------------|--------|----------------------|--------|
| <b>Age</b>         |                       |        |                      |        |
| Median             | 37                    |        | 49                   |        |
| Range              | 24-53                 |        | 31-63                |        |
|                    | <i>n</i>              | (%)    | <i>n</i>             | (%)    |
| <b>Ethnicity</b>   |                       |        |                      |        |
| Non-Mapuche        | 6                     | (50%)  | 3                    | (43%)  |
| Mapuche            | 6                     | (50%)  | 4                    | (57%)  |
| <b>HPV</b>         |                       |        |                      |        |
| Not detected       | 12                    | (100%) | 0                    | (0%)   |
| Positive           | 0                     | (0%)   | 7                    | (100%) |
| <b>HPV subtype</b> |                       |        |                      |        |
| HPV 16             | 0                     | (0%)   | 6                    | (86%)  |
| HPV 18             | 0                     | (0%)   | 3                    | (43%)  |
| Other HPV type     | 0                     | (0%)   | 2                    | (29%)  |

**Supplementary Table 3.** Comparison of the Validation and Prevalence cohort

|                              | Normal                    |                           |                   | Cancer                    |                           |                   |       |    |       |                         |
|------------------------------|---------------------------|---------------------------|-------------------|---------------------------|---------------------------|-------------------|-------|----|-------|-------------------------|
|                              | Validation cohort<br>n=19 | Prevalence cohort<br>n=18 | <i>P</i> -value   | Validation cohort<br>n=30 | Prevalence cohort<br>n=90 | <i>P</i> -value   |       |    |       |                         |
| <b>Age</b>                   |                           |                           |                   |                           |                           |                   |       |    |       |                         |
| Median                       | 36                        | 41                        | 0.28 <sup>1</sup> | 50                        | 52                        | 0.36 <sup>1</sup> |       |    |       |                         |
| Range                        | 18-79                     | 29-62                     |                   | 32-84                     | 23-86                     |                   |       |    |       |                         |
|                              | <i>n</i>                  | (%)                       | <i>n</i>          | (%)                       | <i>n</i>                  | (%)               |       |    |       |                         |
| <b>Ethnicity</b>             |                           |                           |                   |                           |                           |                   |       |    |       |                         |
| Non-Mapuche                  | 12                        | (63%)                     | 10                | (56%)                     | 0.64 <sup>2</sup>         | 27                | (90%) | 62 | (69%) | <b>0.02<sup>2</sup></b> |
| Mapuche                      | 7                         | (37%)                     | 8                 | (44%)                     |                           | 3                 | (10%) | 28 | (31%) |                         |
| <b>Socio-economic status</b> |                           |                           |                   |                           |                           |                   |       |    |       |                         |
| Indigent                     | 7                         | (37%)                     | 11                | (61%)                     | 0.33 <sup>2</sup>         | 10                | (33%) | 52 | (58%) | <b>0.02<sup>2</sup></b> |
| ≤USD310/month                | 8                         | (42%)                     | 5                 | (28%)                     |                           | 16                | (53%) | 24 | (27%) |                         |
| >USD310/month                | 4                         | (21%)                     | 2                 | (11%)                     |                           | 4                 | (13%) | 14 | (16%) |                         |
| <b>HPV</b>                   |                           |                           |                   |                           |                           |                   |       |    |       |                         |
| Not detected                 | 17                        | (89%)                     | 17                | (94%)                     | 1.00 <sup>3</sup>         | 2                 | (7%)  | 7  | (8%)  | 1.00 <sup>2</sup>       |
| Positive                     | 2                         | (11%)                     | 1                 | (6%)                      |                           | 28                | (93%) | 83 | (92%) |                         |
| <b>HPV subtype</b>           |                           |                           |                   |                           |                           |                   |       |    |       |                         |
| HPV 16                       | 0                         | (0%)                      | 1                 | (6%)                      |                           | 22                | (73%) | 62 | (69%) |                         |
| HPV 18                       | 0                         | (0%)                      | 0                 | (0%)                      |                           | 8                 | (27%) | 19 | (21%) |                         |
| Other HPV type               | 2                         | (11%)                     | 0                 | (0%)                      |                           | 2                 | (7%)  | 22 | (24%) |                         |

1. Mann Whitney-U test; 2. Chi<sup>2</sup>-test; 3. Fisher's exact test



**Supplementary Table 4.** Median Promoter methylation in premalignant cervical lesions.

| GENE          | Normal (n=37) |         | LGL (n=53) |         | HGL (n=84) |         | SCC n=120) |         |
|---------------|---------------|---------|------------|---------|------------|---------|------------|---------|
|               | median        | p-value | median     | p-value | median     | p-value | median     | p-value |
| <i>FKBP6</i>  | 32.69         | -       | 121.50     | >0.01   | 79.65      | >0.01   | 74.54      | >0.01   |
| <i>FKBP6</i>  |               |         | 121.50     | -       | 79.65      | >0.01   | 74.54      | >0.01   |
| <i>FKBP6</i>  |               |         |            |         | 79.65      | -       | 74.54      | 0.1     |
| <i>INTS1</i>  | 40.35         |         | 55.78      | >0.01   | 48.07      | >0.01   | 55.01      | >0.01   |
| <i>INTS1</i>  |               |         | 55.78      | -       | 48.07      | 0.84    | 55.01      | 0.18    |
| <i>ZNF516</i> | 84.94         | -       | 235.94     | >0.01   | 136.42     | >0.01   | 273.75     | >0.01   |
| <i>ZNF516</i> |               |         | 235.94     | -       | 136.42     | >0.01   | 273.75     | >0.01   |
| <i>ZNF516</i> |               |         |            |         | 136.42     | -       | 273.75     | >0.01   |

**Supplementary Table 5.** Distribution of gene promoter methylation across tissue types

| Gene                      | Normal<br>n=37 |       | LSIL<br>n=53   |       | HSIL<br>n=84   |       | Cancer<br>n=120 |       |
|---------------------------|----------------|-------|----------------|-------|----------------|-------|-----------------|-------|
|                           | <i>n/total</i> | (%)   | <i>n/total</i> | (%)   | <i>n/total</i> | (%)   | <i>n/total</i>  | (%)   |
| <i>FKBP6</i> methylation  | 7/37           | (19%) | 51/53          | (96%) | 57/84          | (68%) | 68/109          | (62%) |
| <i>INTS1</i> methylation  | 9/36           | (25%) | 22/53          | (42%) | 22/82          | (27%) | 46/105          | (44%) |
| <i>ZNF516</i> methylation | 1/36           | (3%)  | 33/53          | (62%) | 28/76          | (37%) | 80/119          | (67%) |
| <i>SAP130</i> methylation | 4/19           | (21%) | ND             | (ND)  | ND             | (ND)  | 0/30            | (0%)  |
| <i>GGTLA4</i> methylation | 10/19          | (53%) | ND             | (ND)  | ND             | (ND)  | 14/30           | (47%) |

LSIL - Low Grade Squamous Intraepithelial Lesion  
 HSIL - High Grade Squamous Intraepithelial Lesions  
 ND -Not Determined

**Supplementary Table 6.** Primer and probe list of genes used for bisulfite sequencing and (quantitative) Methylation Specific PCR

| Gene name           | Forward 5' – 3'            | Reverse 5' – 3'            | Probe 5'/56-FAM/-/ZEN/-/3IABkFQ/3' | Product (BP) | Tm (°C) |
|---------------------|----------------------------|----------------------------|------------------------------------|--------------|---------|
| <b>BS-GGTLA4</b>    | GAGGTTTGTGGTAGAGGTTTC      | CAAAACAACCTCAAAAAAATTTTC   |                                    | 397          | 52      |
| <b>BS-FKBP6</b>     | GTTTTAAAAGTGTGTGTGTGTGT    | GAACCTCTAAAACACAAAAACCAC   |                                    | 439          | 56      |
| <b>BS-ZNF516</b>    | GAGTGTGTGGTAGATTGTTG       | CTATAACAATACCAAACCTCAC     |                                    | 347          | 56      |
| <b>BS-SAP130</b>    | GGGAGGGGTGGGTTGATTC        | GCTAACCCCACTCACCCCC        |                                    | 443          | 56      |
| <b>BS-INTS1</b>     | TTTTTTTTGTAGTTTTATTATAGC   | CCAAAATCACTAAAAAAAACAAAC   |                                    | 432          | 54      |
| <b>MSP-ZNF516 M</b> | TACGACGGTGAGGTACGTATAC     | CAAAAACACAAAAATAATACTCGAA  | AACGCCAAACCTCACCGTCGTACG           | 241          | 54.2    |
| <b>MSP-ZNF516 U</b> | GTATGATGGTGAGGTATGTATATGA  | CAAAAACACAAAAATAATACTCAA   |                                    | 242          | 50      |
| <b>MSP-FKBP6 M</b>  | TTACGTGTTTTATTATGTTTCGTGC  | GAAAAAACACTCATCGTTTCGTT    | CGACCCTAACCTCGCGAACTCTA            | 137          | 58      |
| <b>MSP-FKBP6 U</b>  | ATGTGTTTTATTATGTTTGTGTGT   | AAAAAACACTCATCATTTTCATT    |                                    | 135          | 54      |
| <b>MSP-GGTLA4 M</b> | TTGGATATTAAGGGTGATTTTC     | CCGTAATCCTACAAACCCTACG     | ACGTCCTCCAACCTCAACCCTCCA           | 183          | 55      |
| <b>MSP-GGTLA4 U</b> | TTGGATATTAAGGGGTGATTTTT    | TTCCATAATCCTACAAACCCTACAT  |                                    | 185          | 52.5    |
| <b>MSP-SAP130 M</b> | CGTTAGTTAATAGACGGGAGGTTTC  | CTAAATACTACGCCCAATAACCG    | TCCCGCGCGCTCTCCGTCTATAAA           | 189          | 52.5    |
| <b>MSP-SAP130 U</b> | TGTGTTAGTTAATAGATGGGAGGTTT | CCTAAATACTACGCCCAATAACCAC  |                                    | 192          | 55      |
| <b>MSP-INTS1 M</b>  | CGAAGGGGTGTTAGTAGTAGC      | AAACAAAAAAAATAACCGACGAT    | TATAACCTCCGCCCTCCCTCCCTA           | 143          | 55      |
| <b>MSP-INTS1 U</b>  | GTGAAGGGGTGTTAGTAGTAGTGT   | AAAAAACAAAAAAAATAACCAACAAT |                                    | 147          | 52      |
| <b>β-actin</b>      | GTGTTTAGGGTTTTTGTGTGTGT    | AACCACTCACCTAAATCATCTTCTC  | ACCACCACCAACACACAATAACAAACACA      | 280          | 58      |

BS: Bisulfite sequencing, MSP: Methylation Specific PCR, M: Methylated, U: Unmethylated, BP: base pairs, Tm: melting temperature.



CHR 13

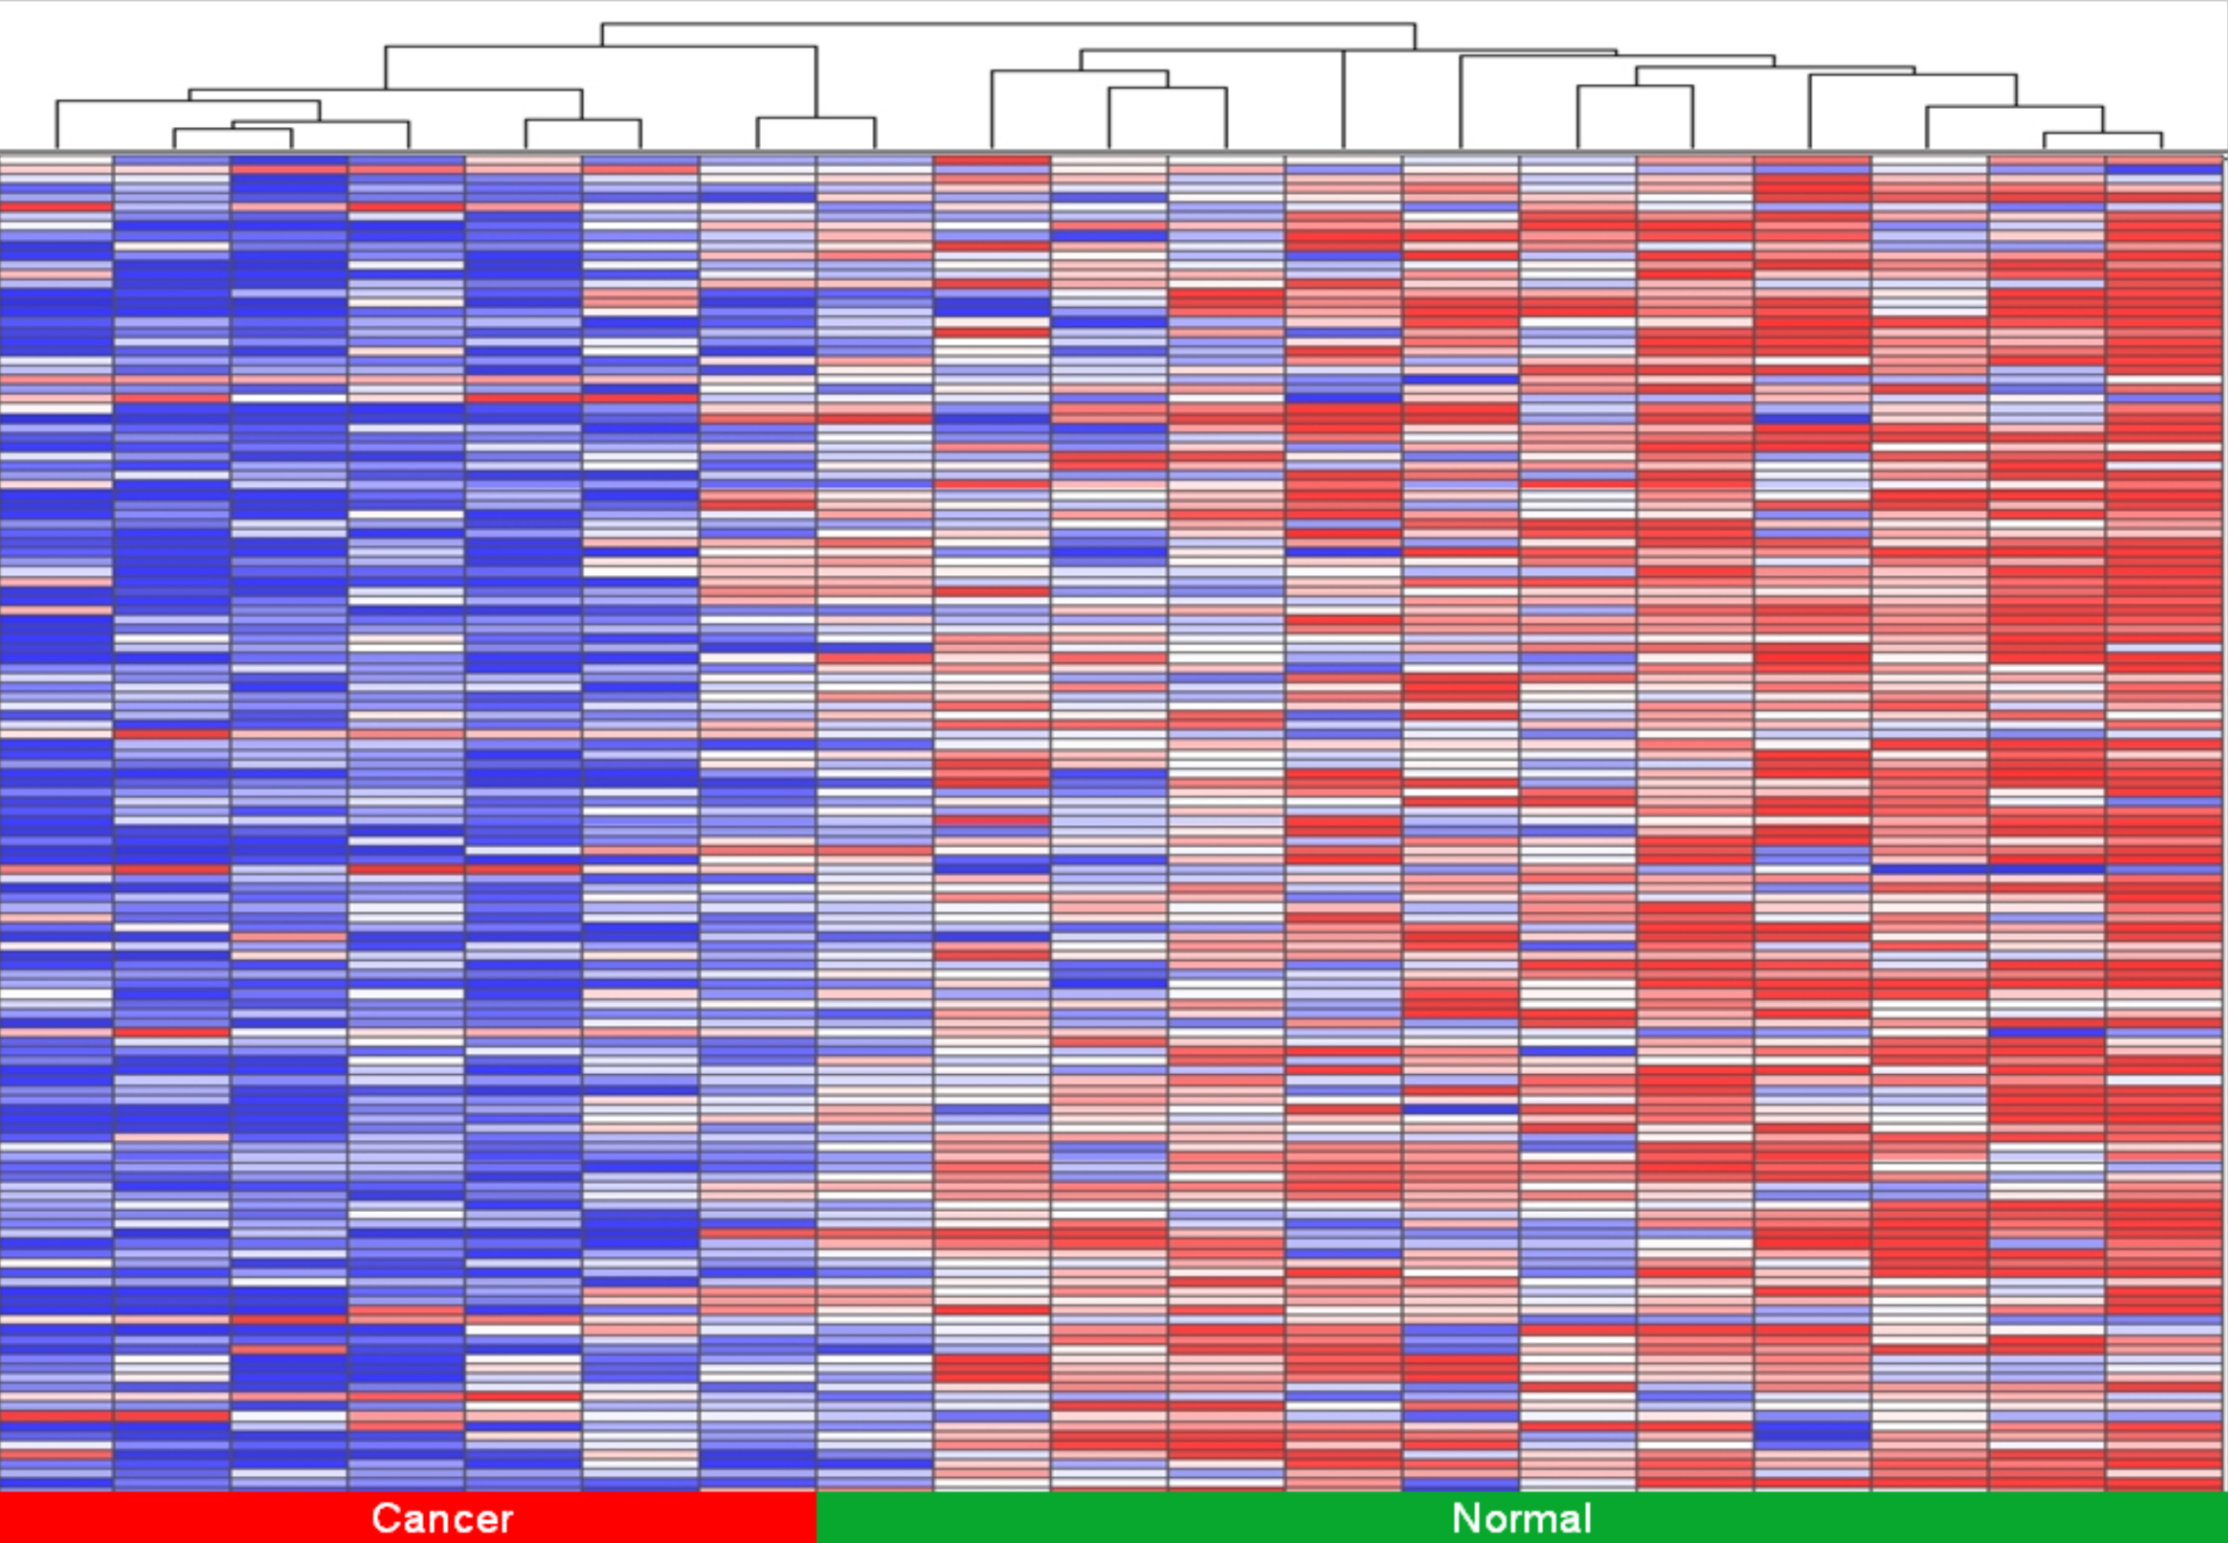

CHR 15

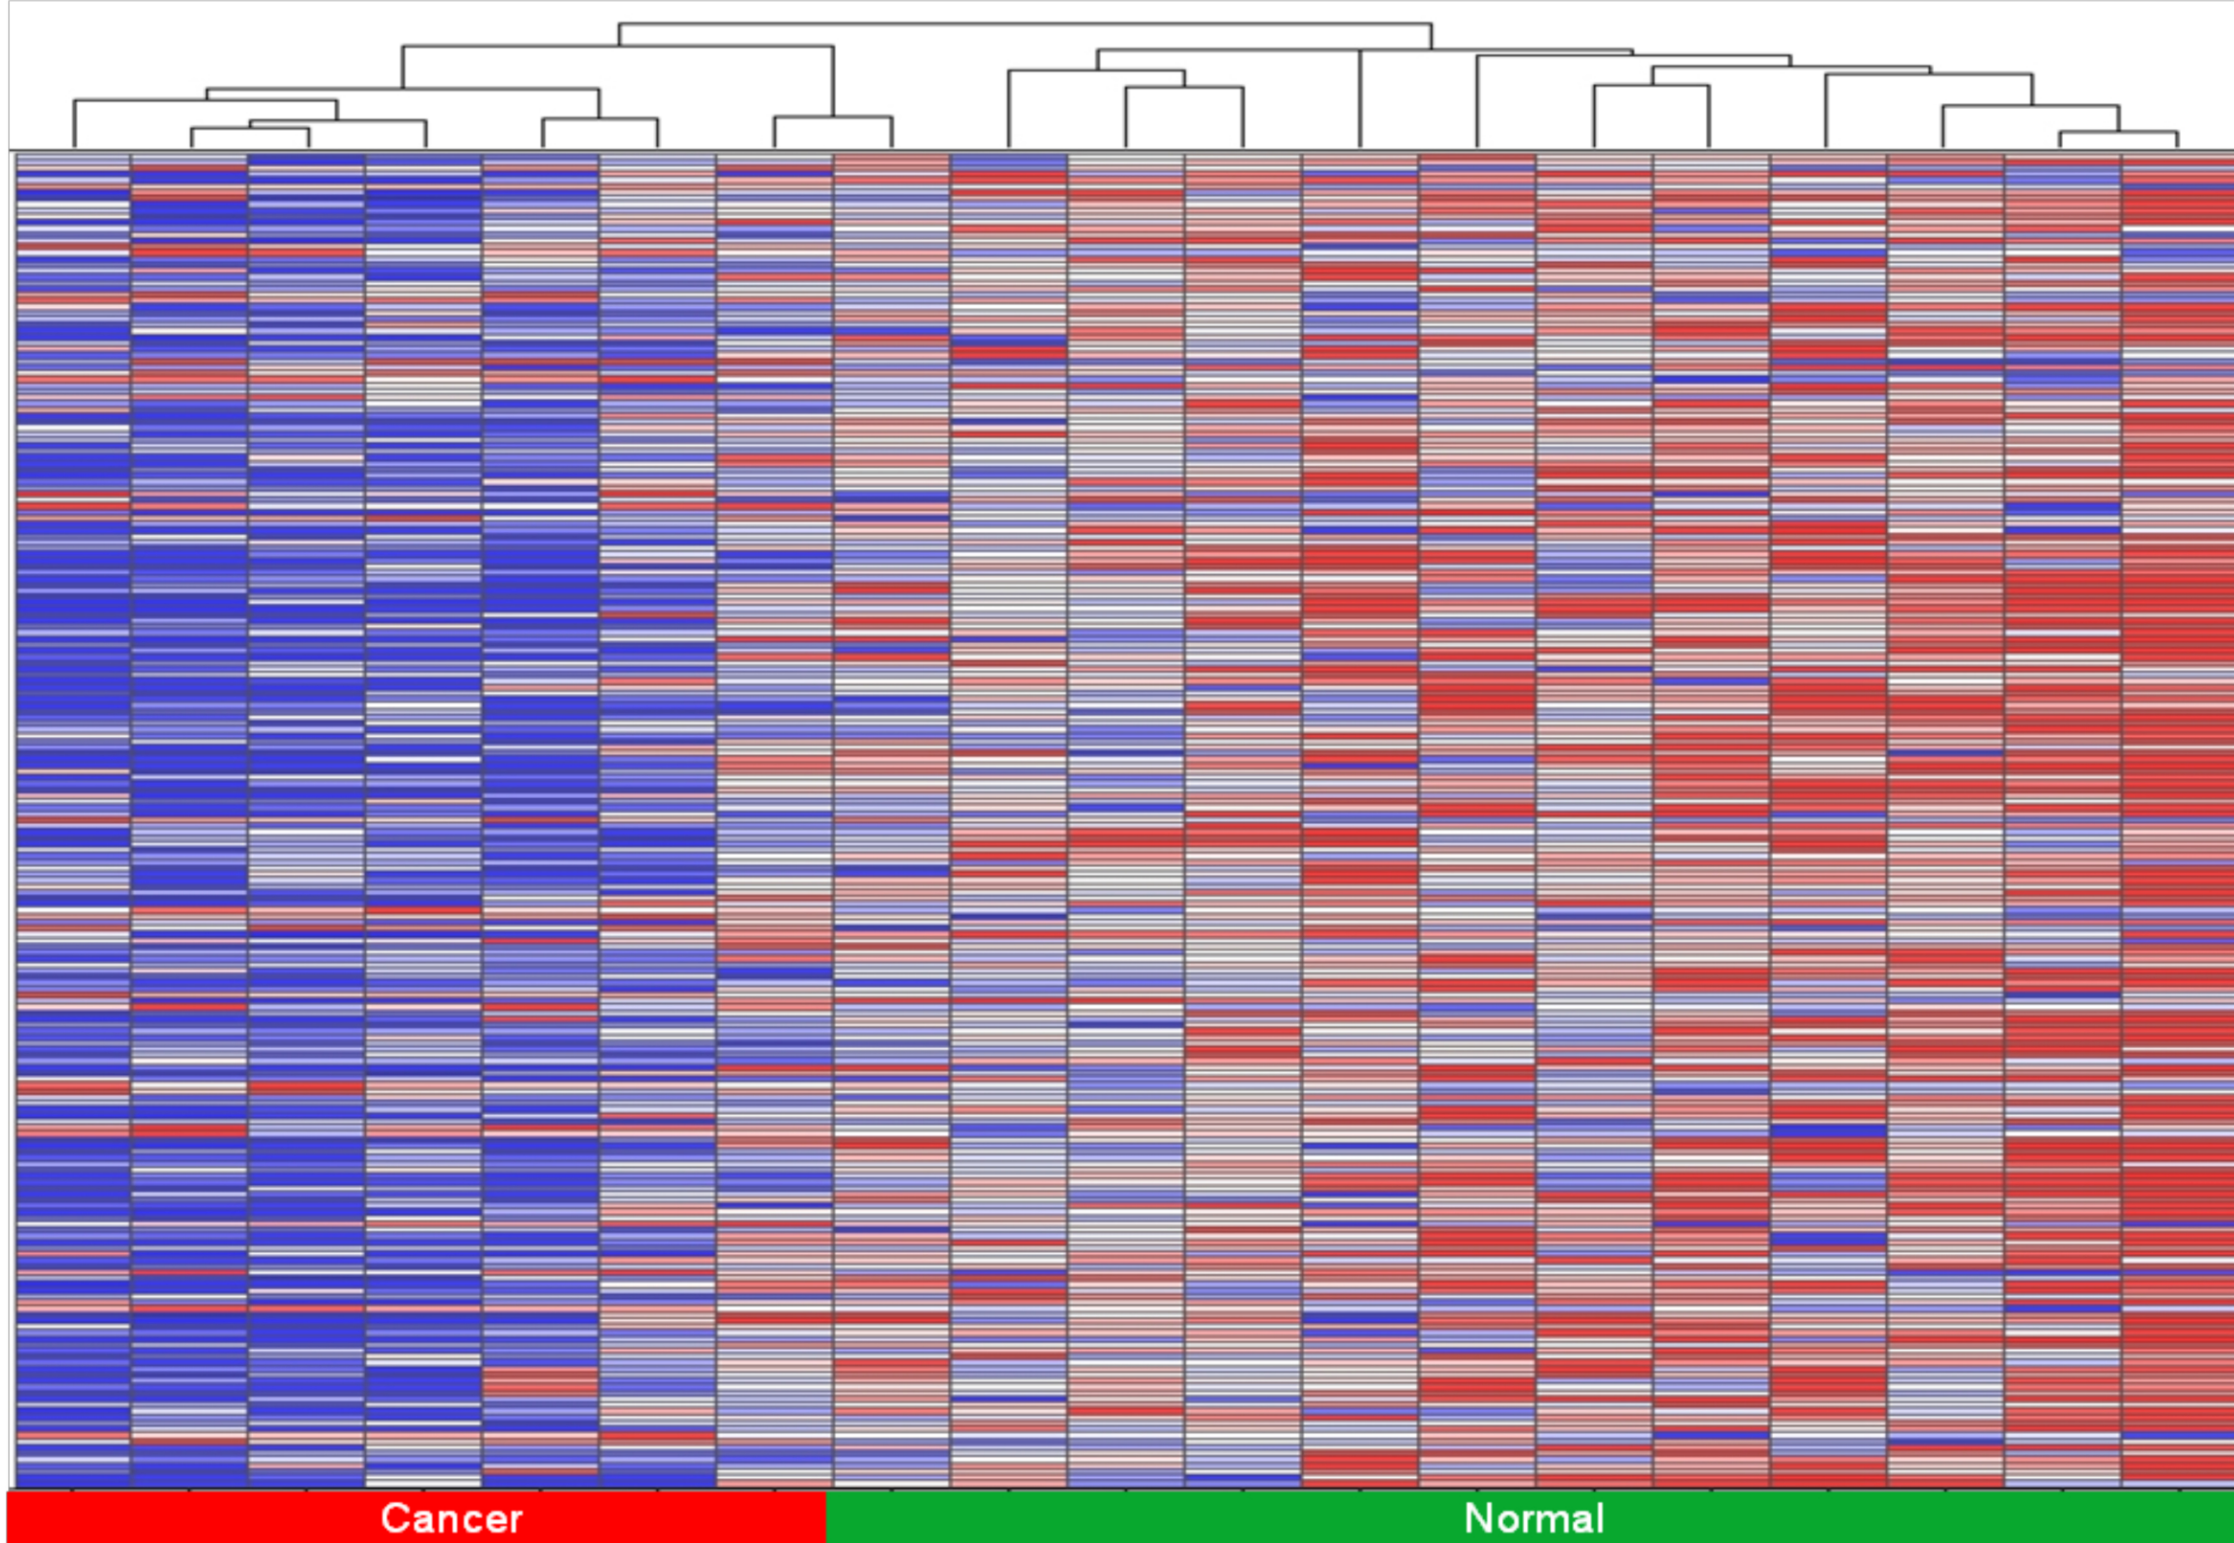

CHR 17

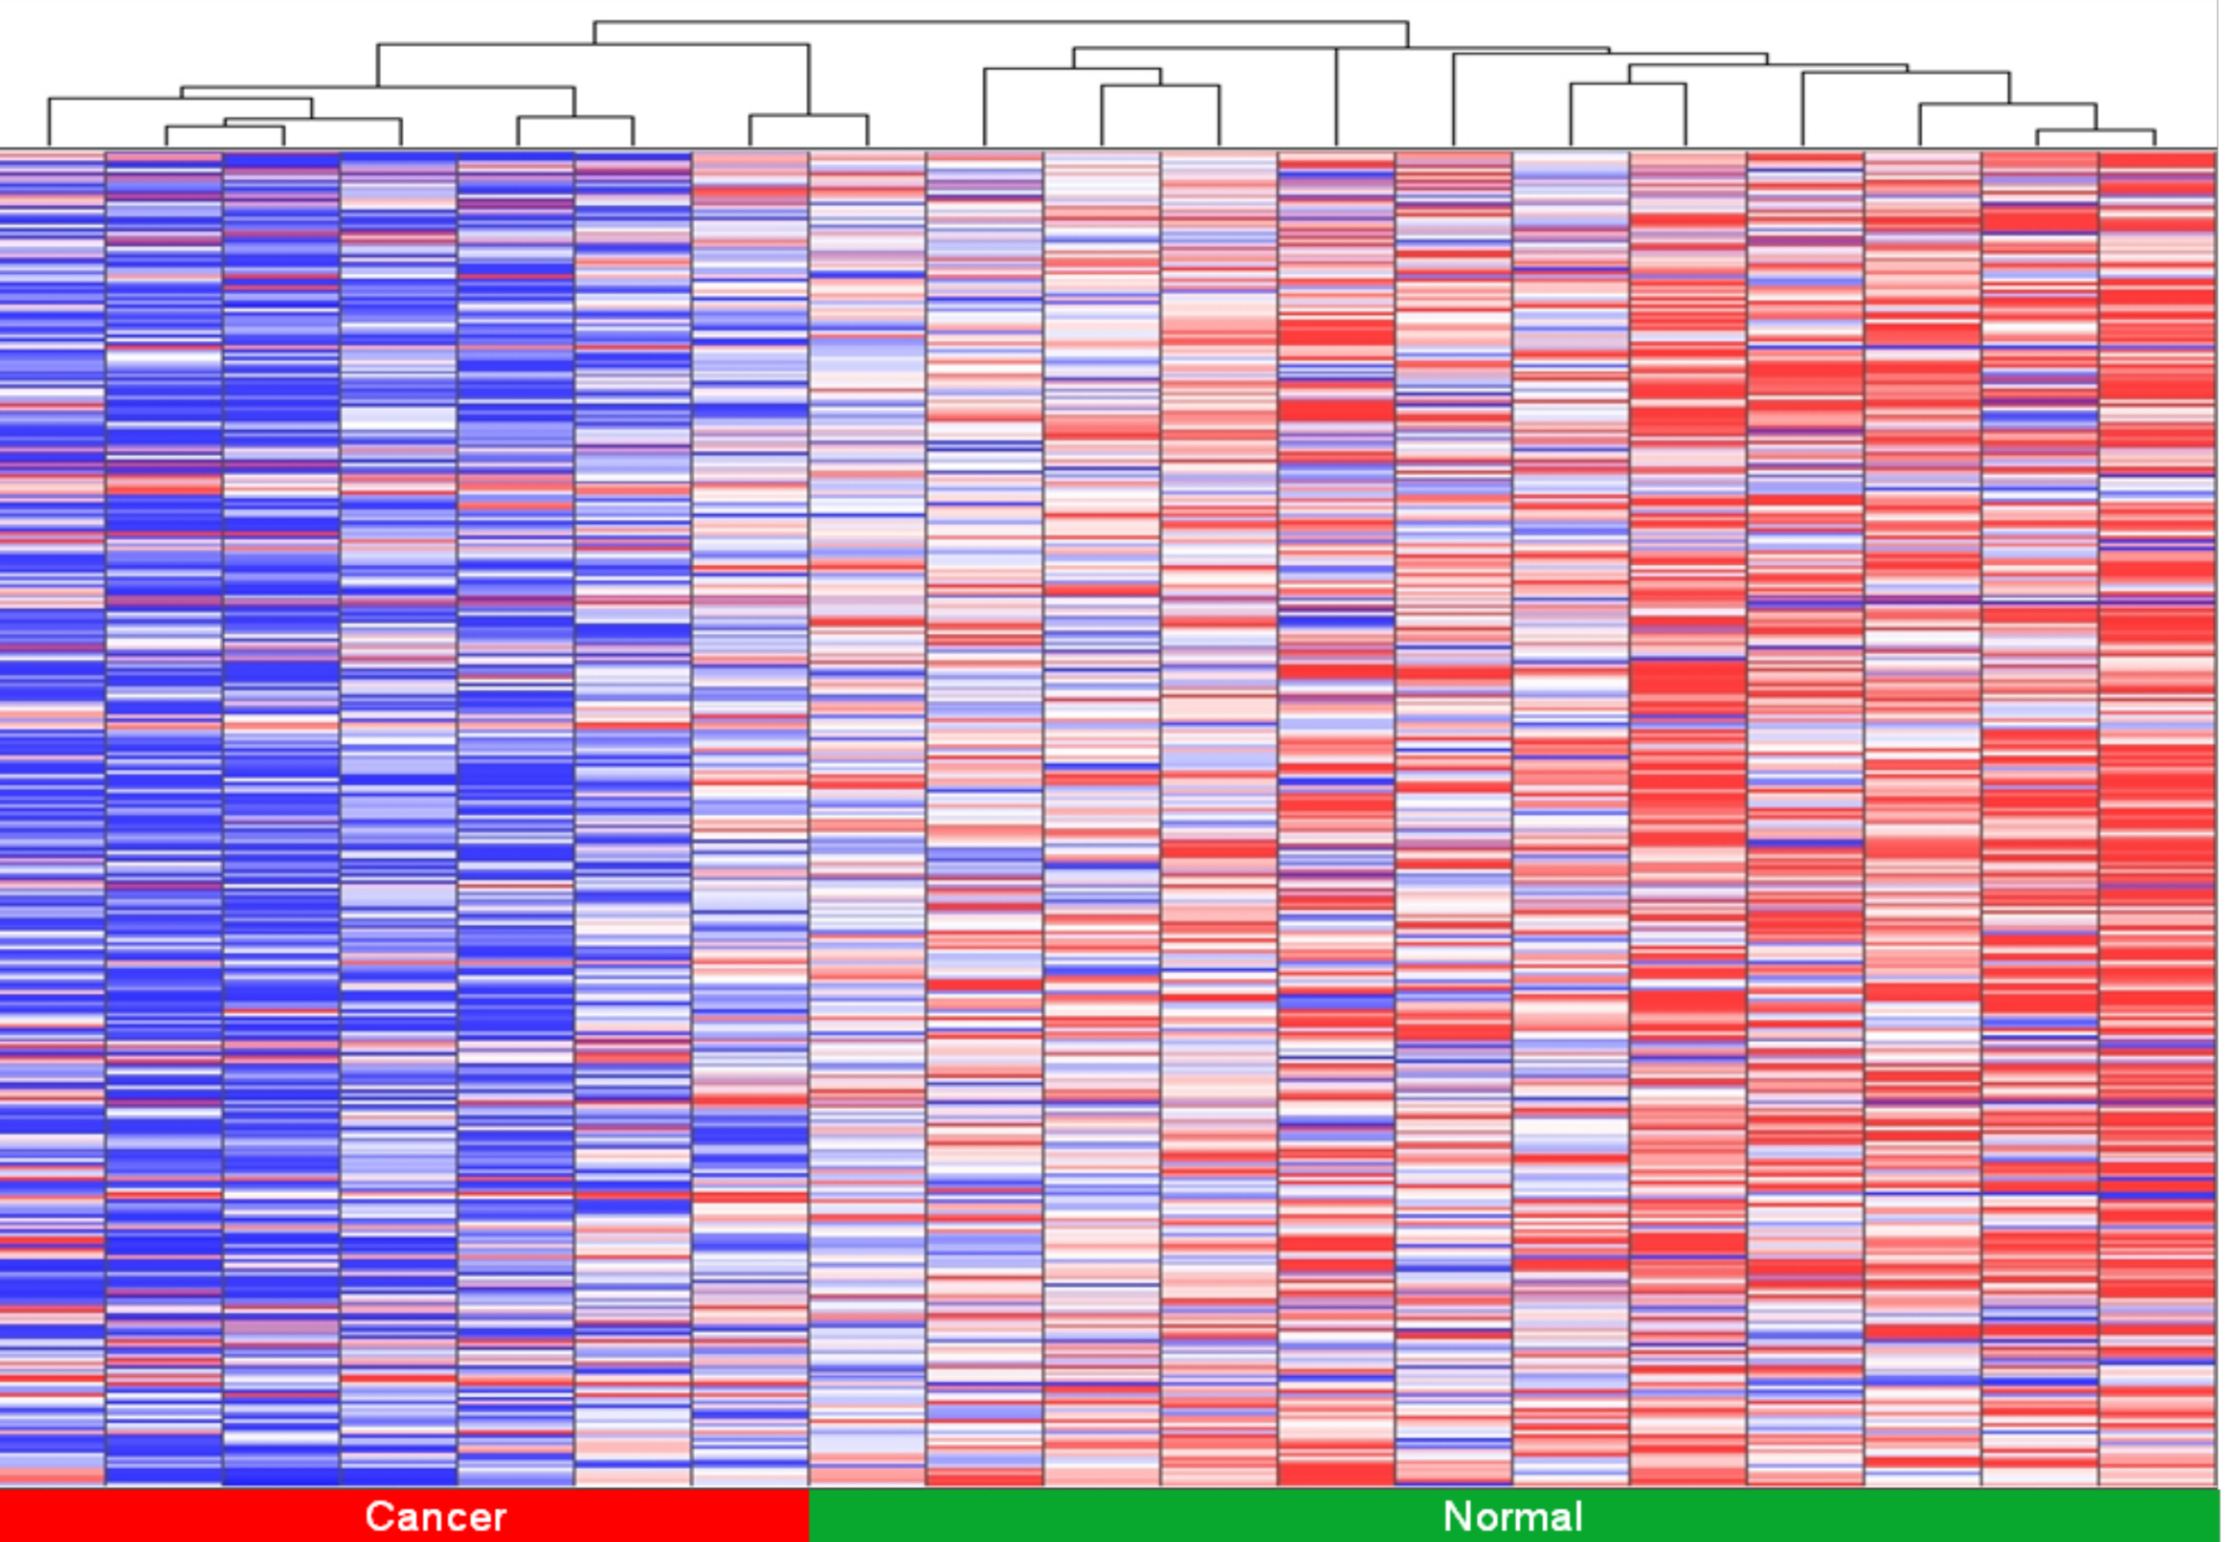

CHR 19

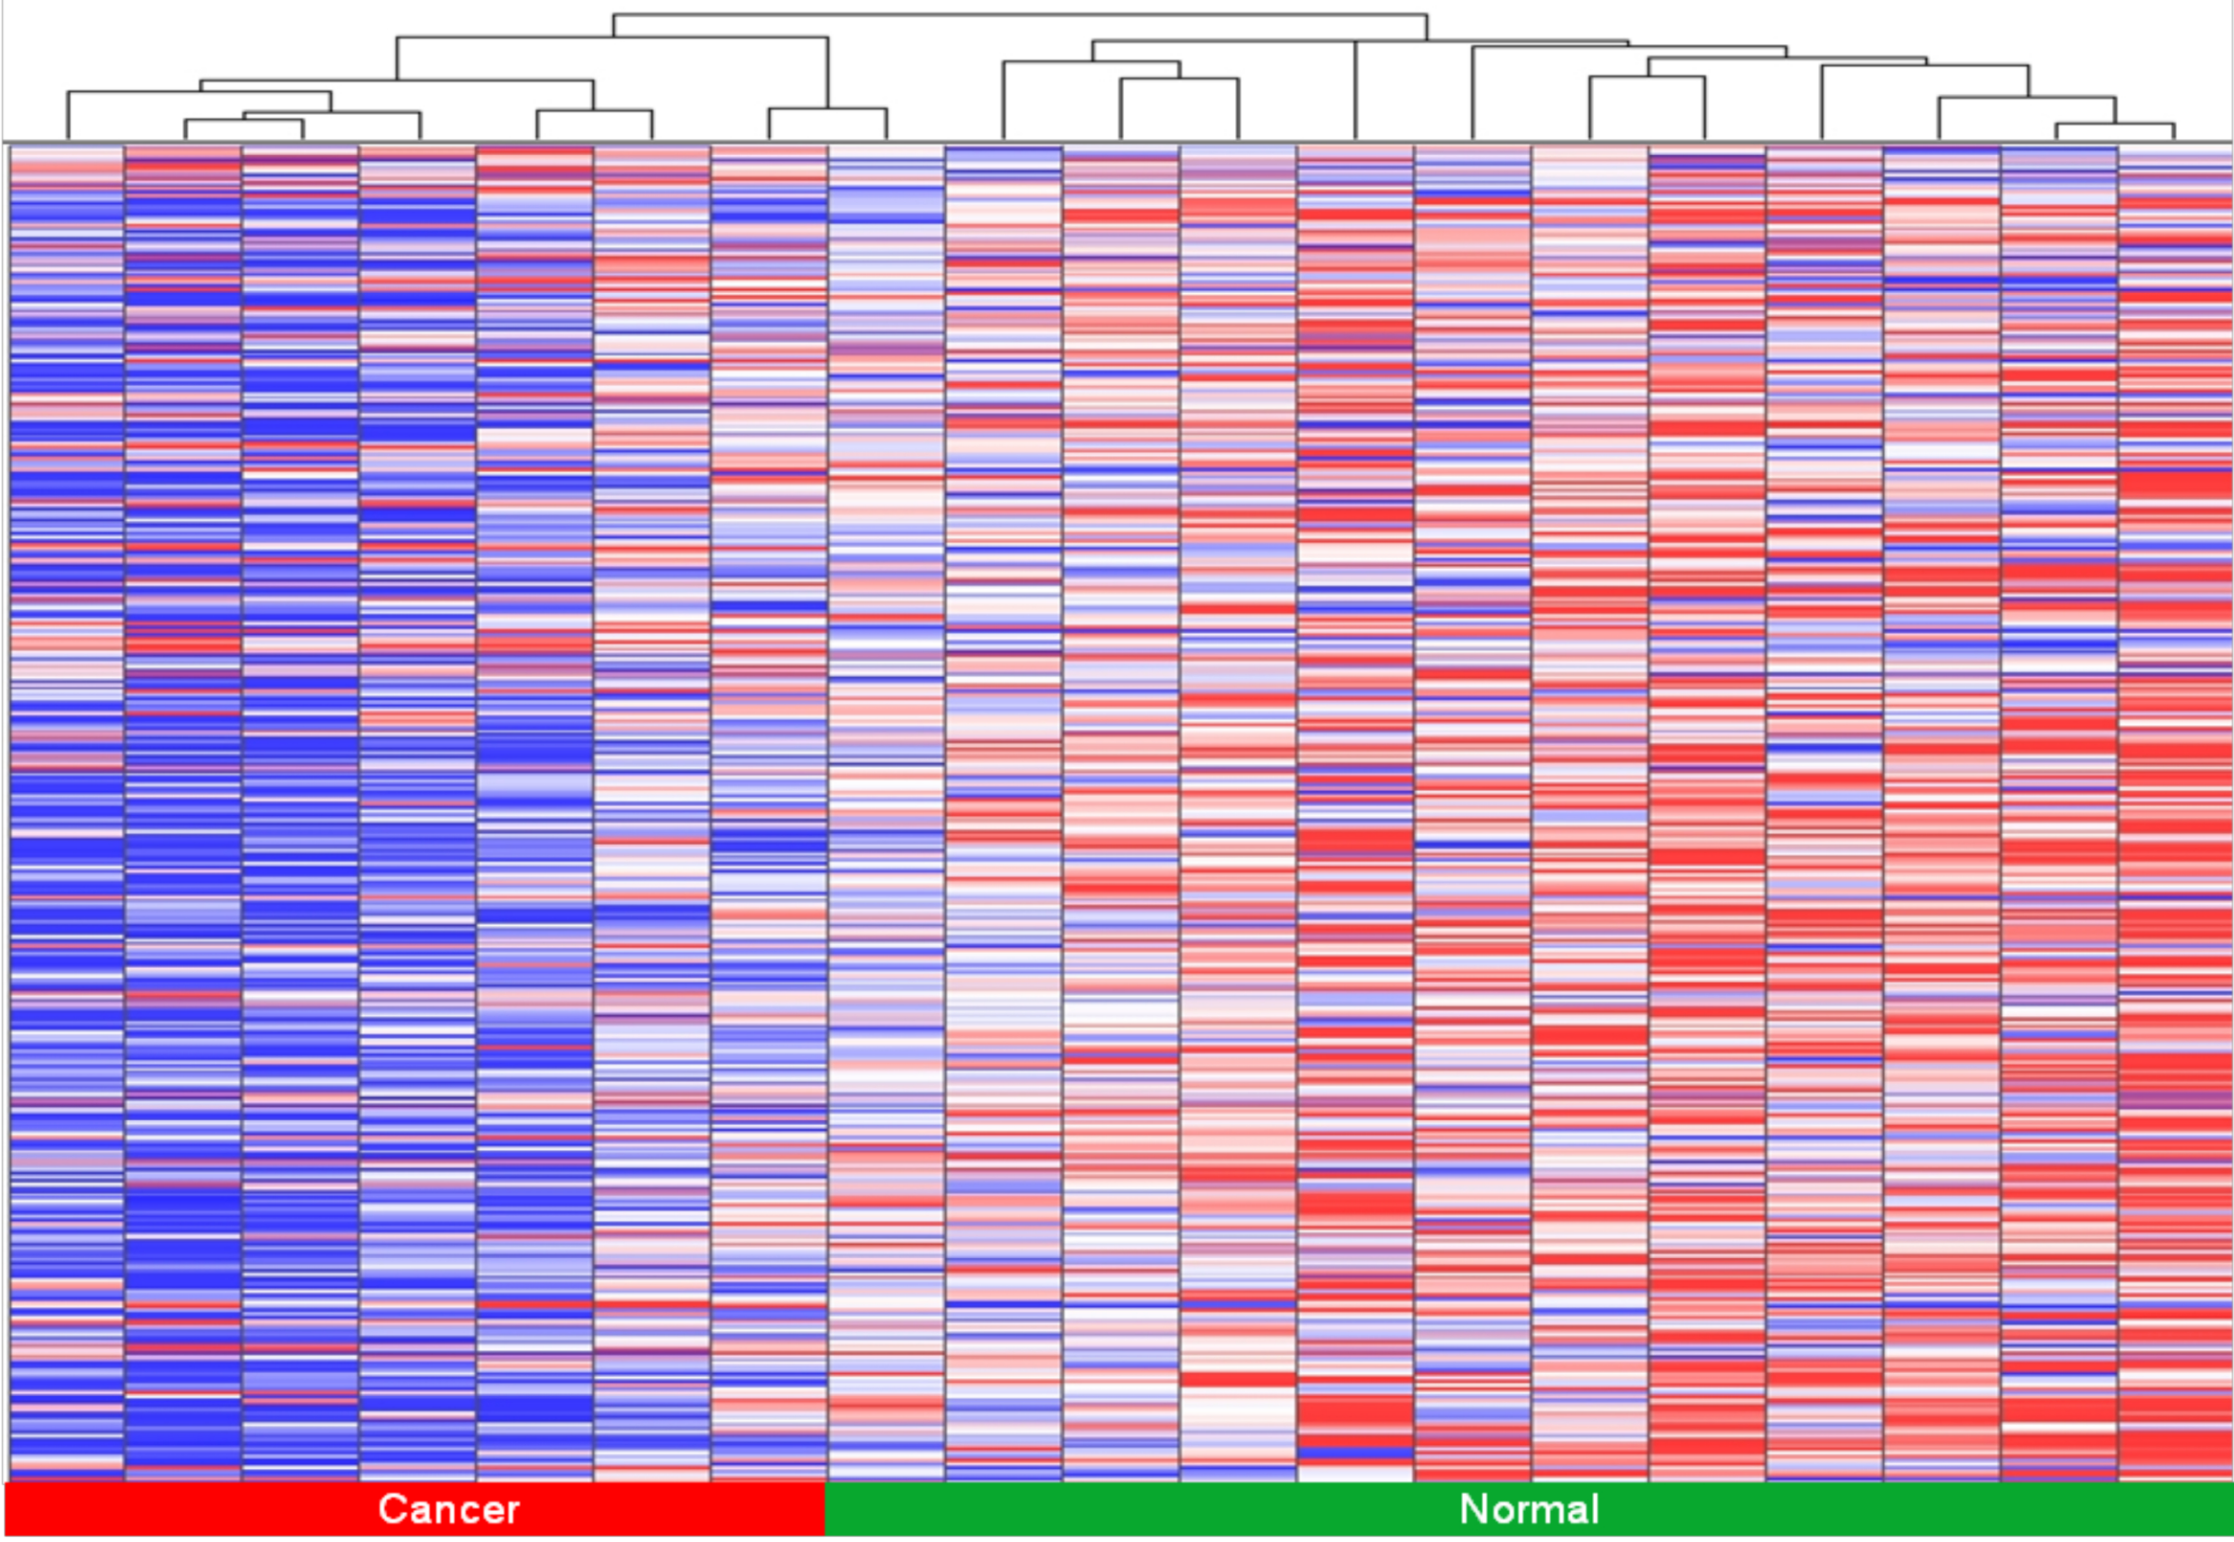



CHR 20

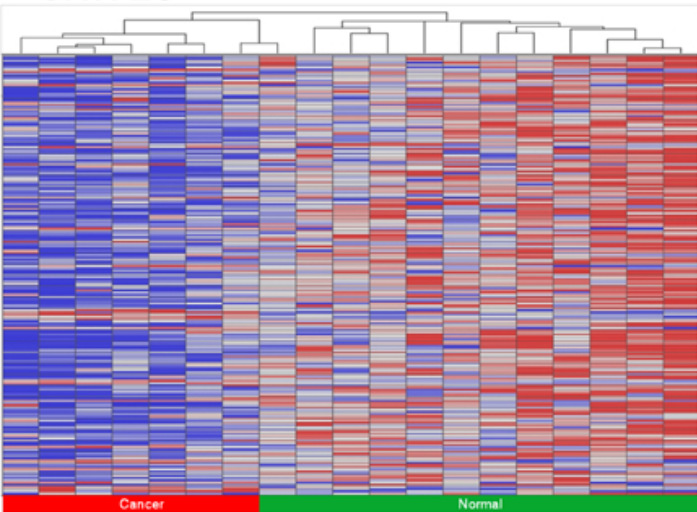

CHR 21

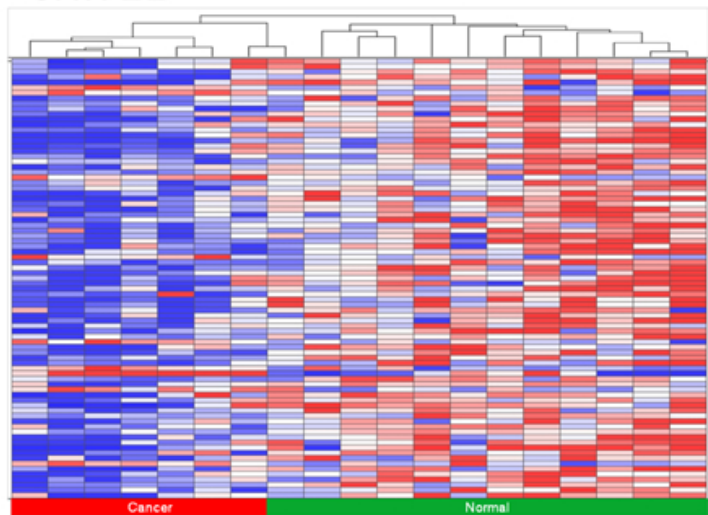

CHR 22

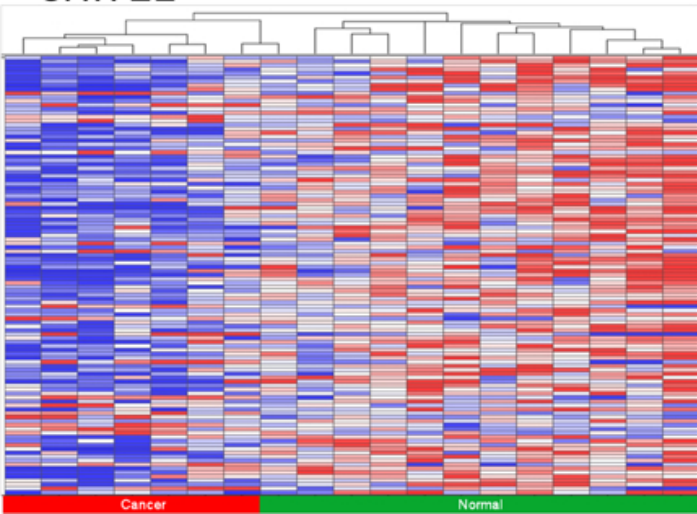

CHR X

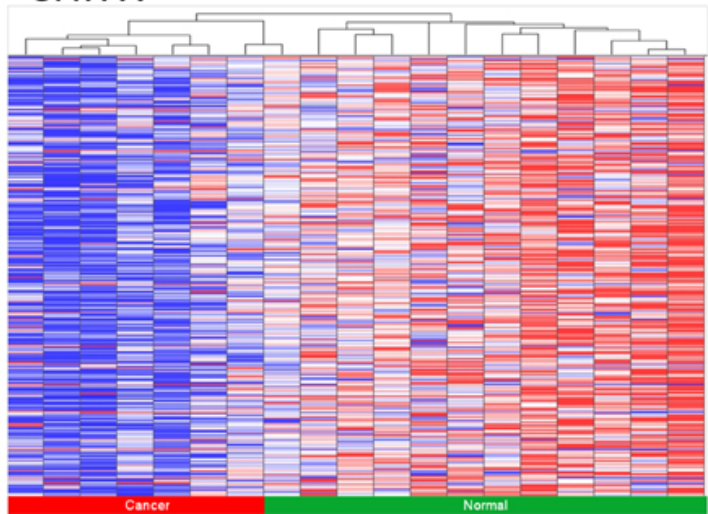

**A**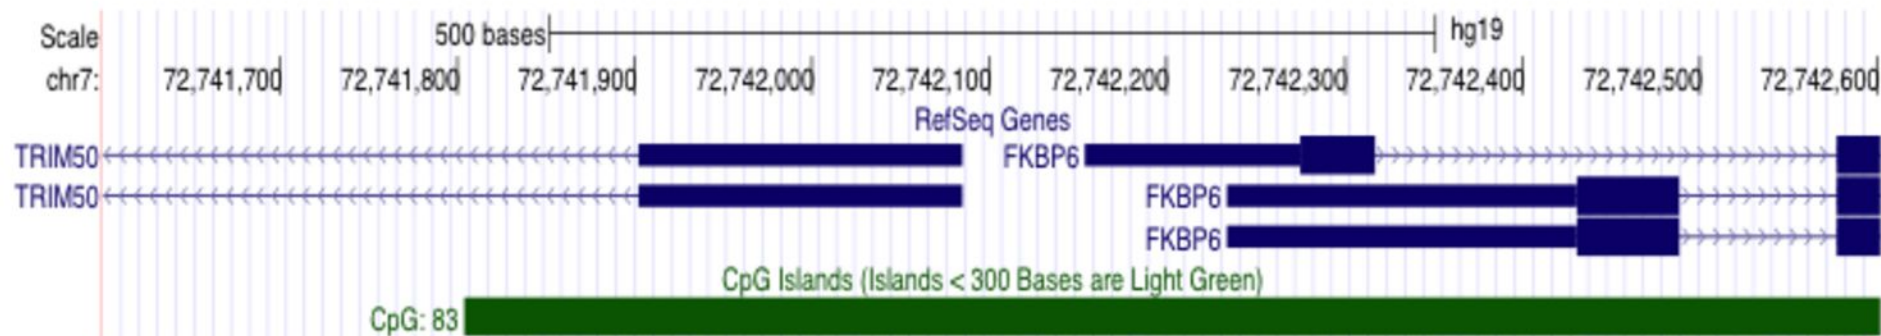**B**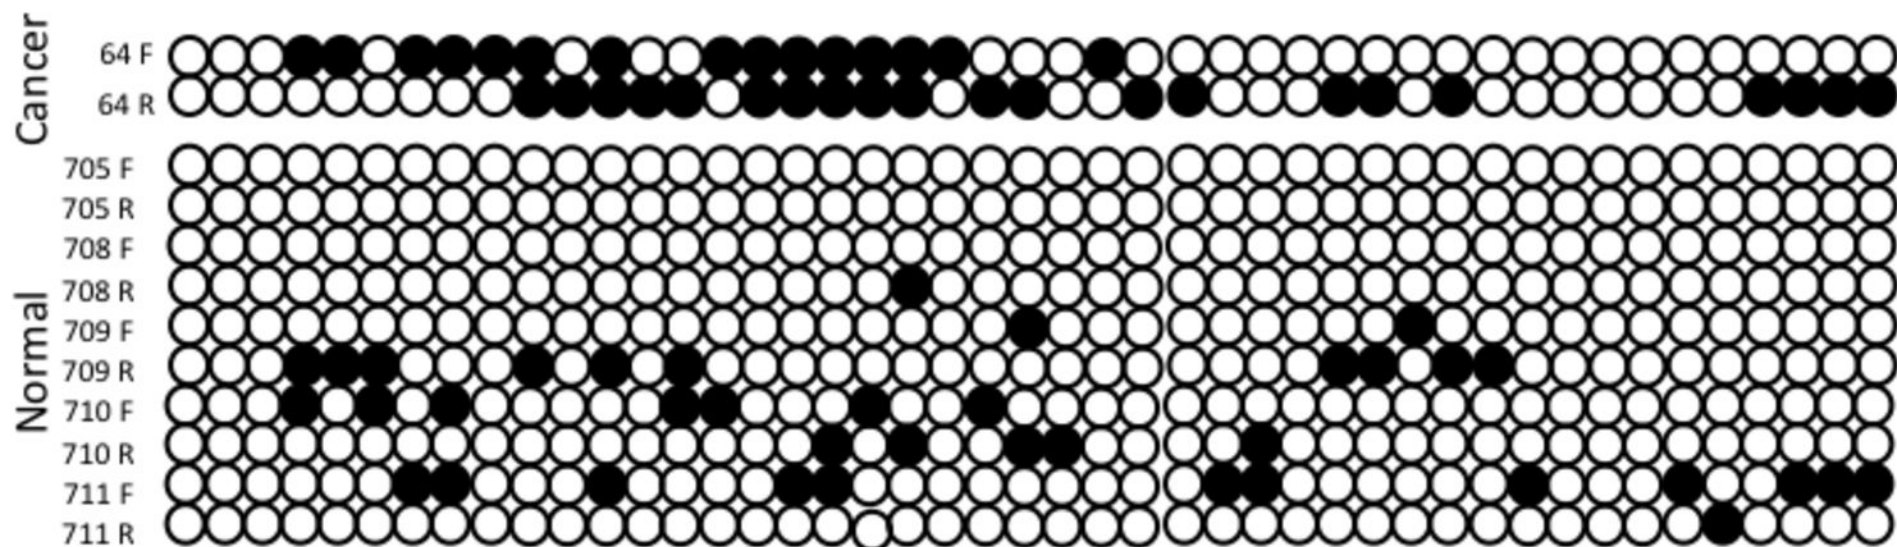

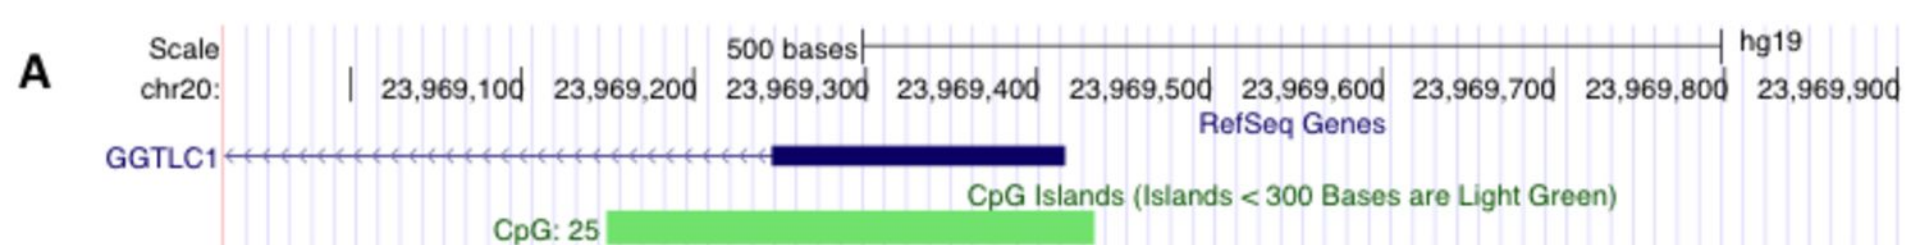

**B**

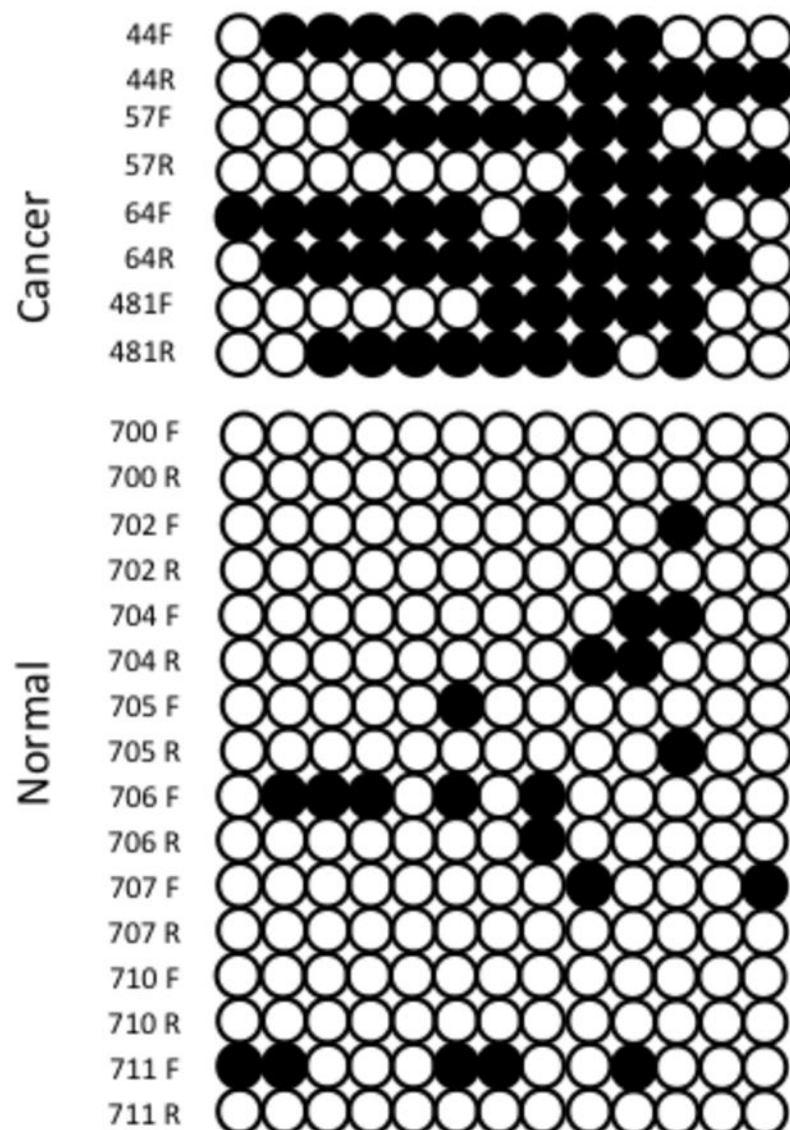



**A**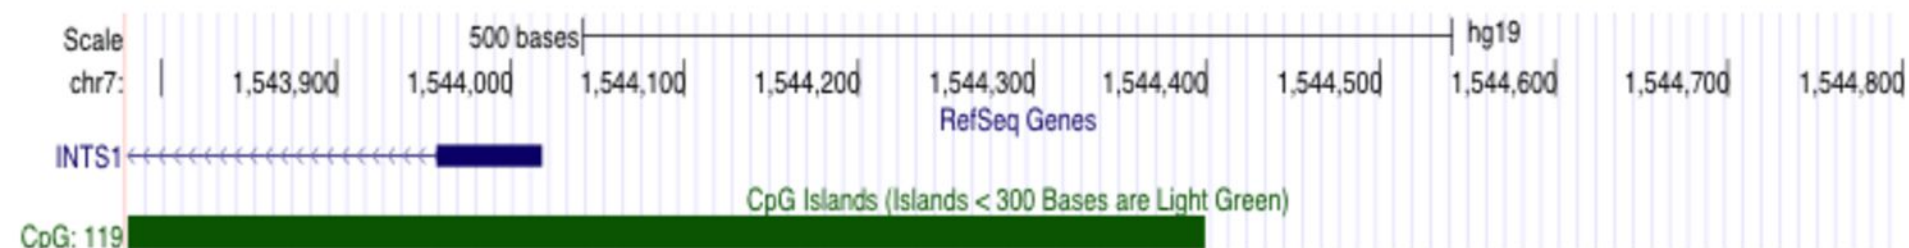**B**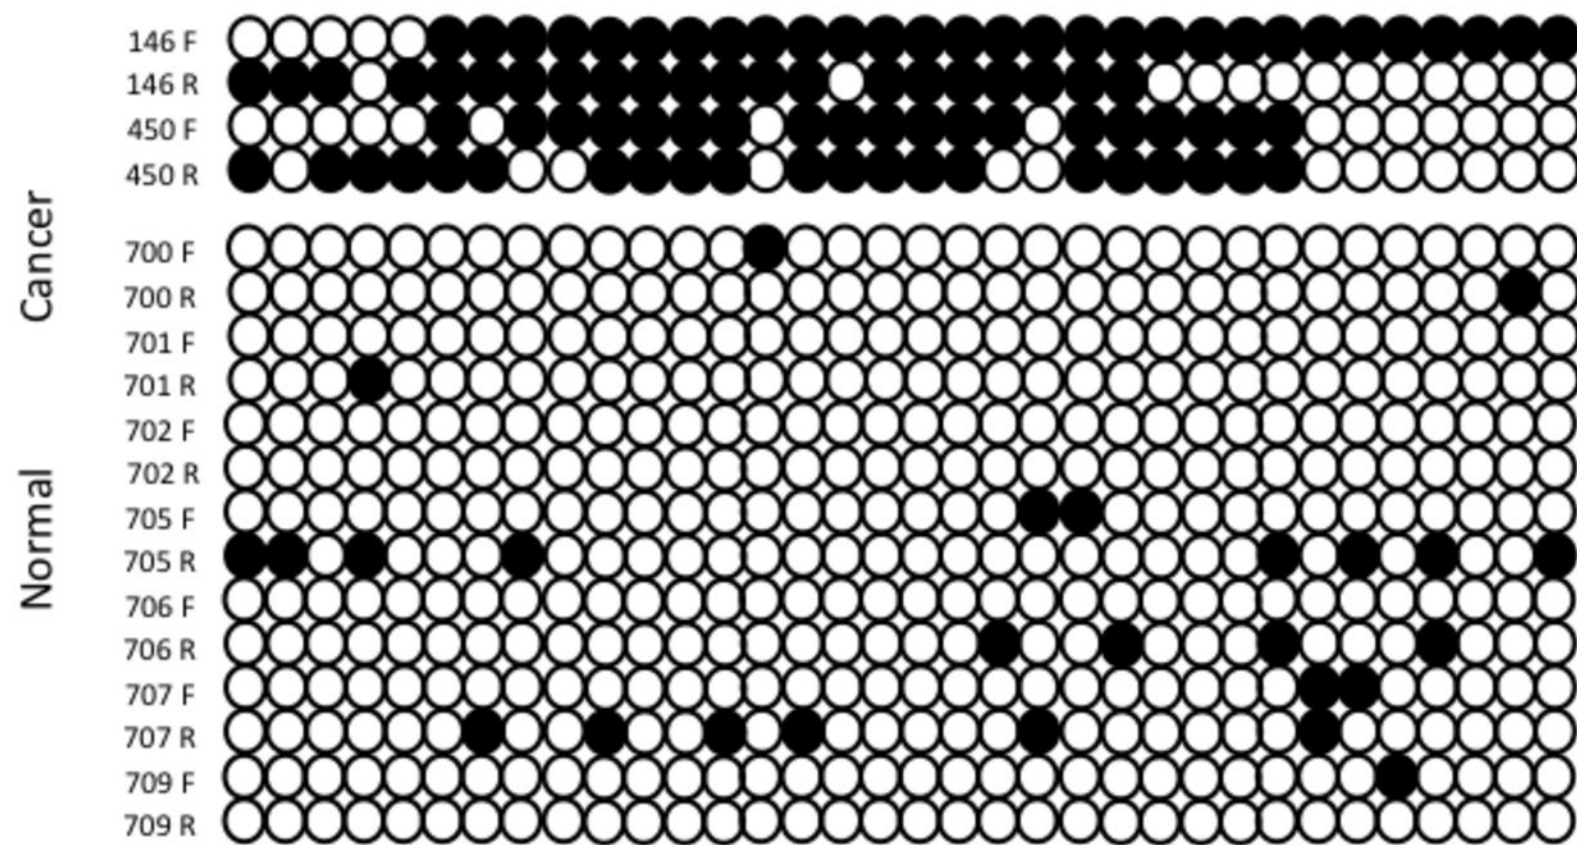



**A**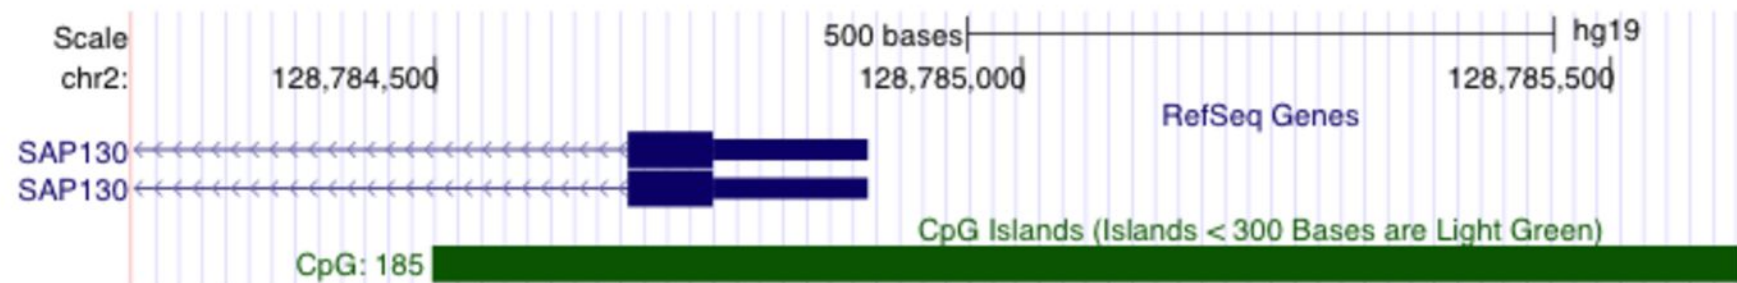**B**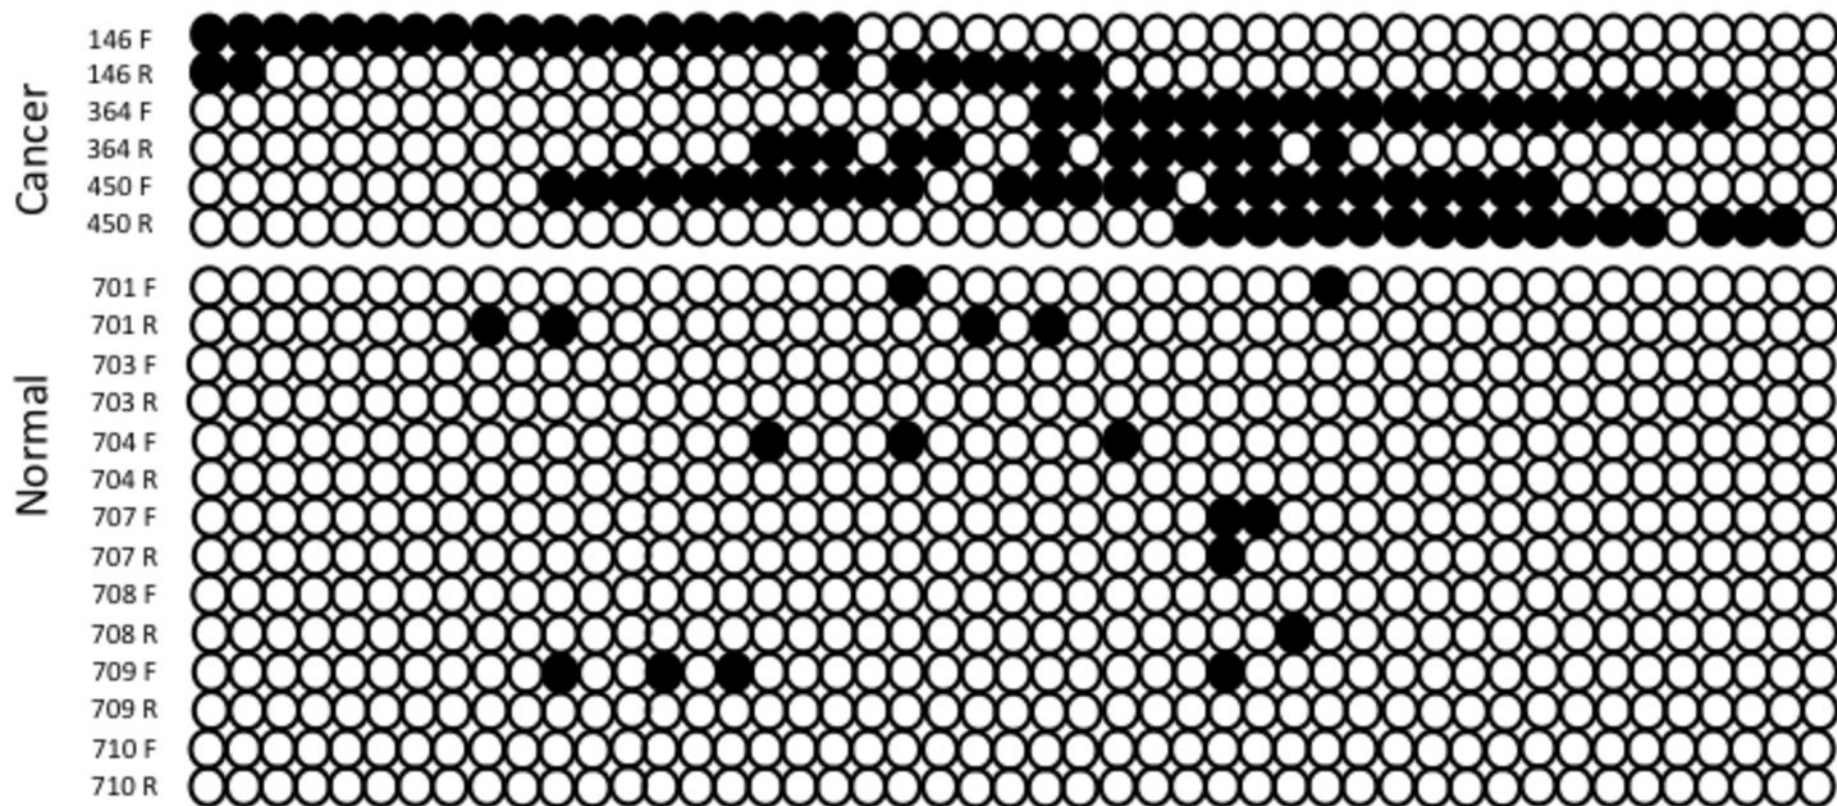



GGTLA4

M U M U M U M U M U M  
708 708 709 709 710 710 57 57 450 450 481

INTS1

U M U M U M U M U M U  
481 C+ C+ BCO BCO 708 708 709 709 710 710

INTS1

M U M U M U M U M U M  
57 57 450 450 481 481 C+ C+ BCO BCO 708

SAP130

U M U M U M U M U M U  
708 709 709 710 710 57 57 450 450 481 481

SAP130

ZNF516

M U M U M U M U M U M  
C+ C+ BCO BCO 708 708 709 709 710 710 57

FKBP6

M U M U M U M U M  
709 709 710 710 57 57 450 450 481

FKBP6

U M U M U M U M U M U  
57 450 450 481 481 C+ C+ BCO BCO 708 708

U M U M U  
481 C+ C+ BCO BCO

### Normal

### Low Grade Lesions

### High Grade Lesions

### Cervical cancer

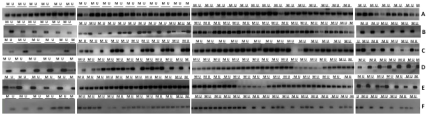

### GGTLA4

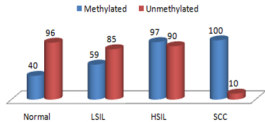

### ZNF516

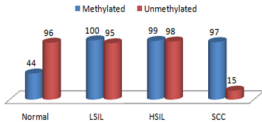

### FKBP6

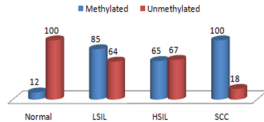

### INTS1

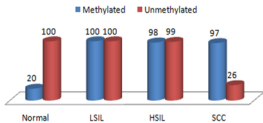

### SAP130

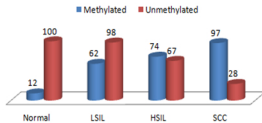

# FKBP6 Validation

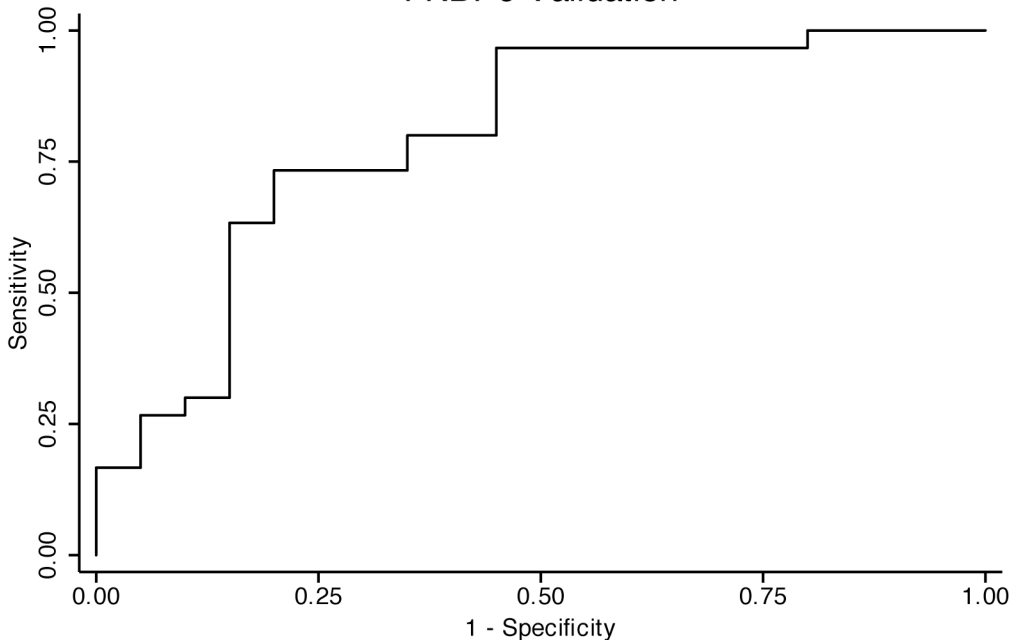

Area under ROC curve = 0.80

# INTS1 Validation

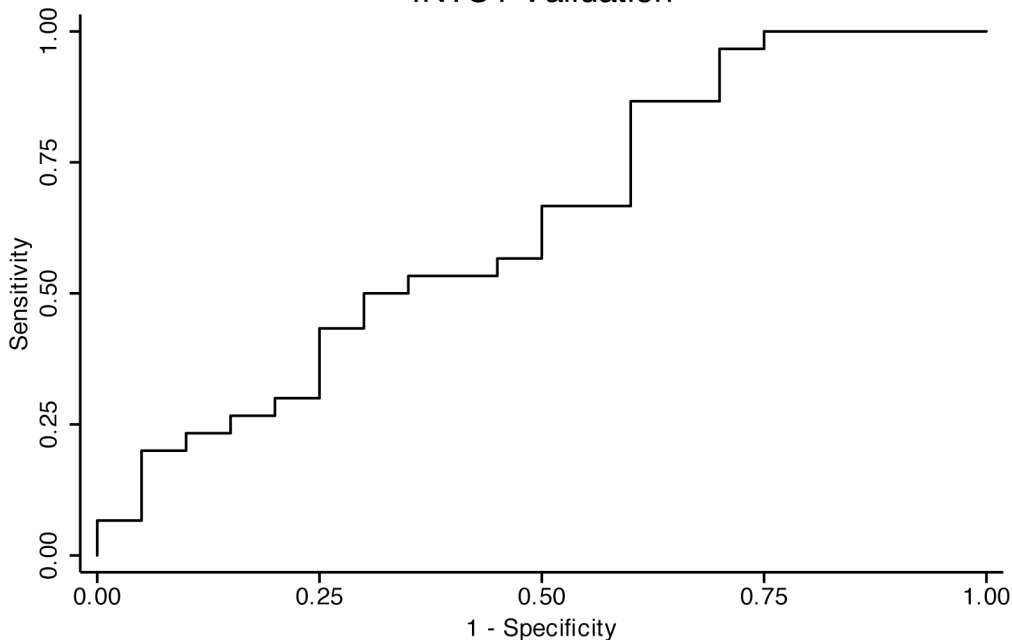

Area under ROC curve = 0.63

# ZNF516 Validation

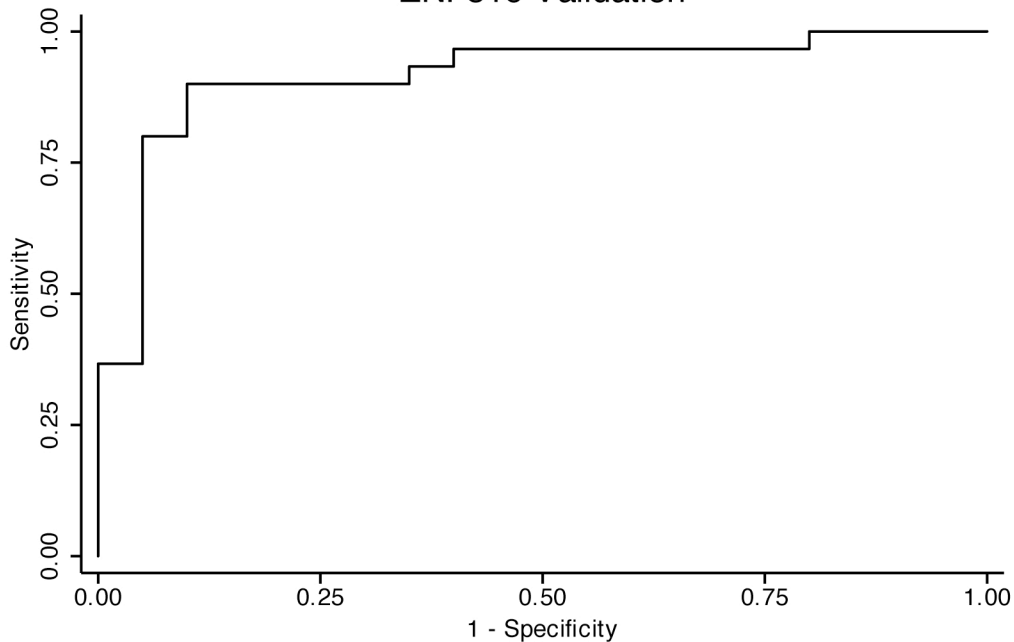

Area under ROC curve = 0.92



# FKBP6 Prevalence

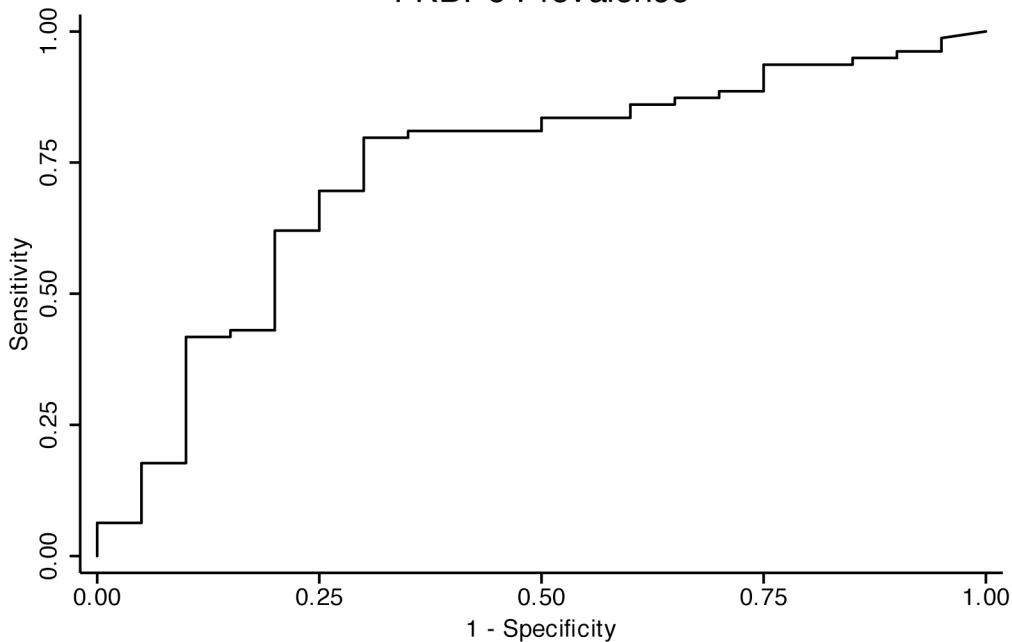

Area under ROC curve = 0.74

# INTS1 Prevalence

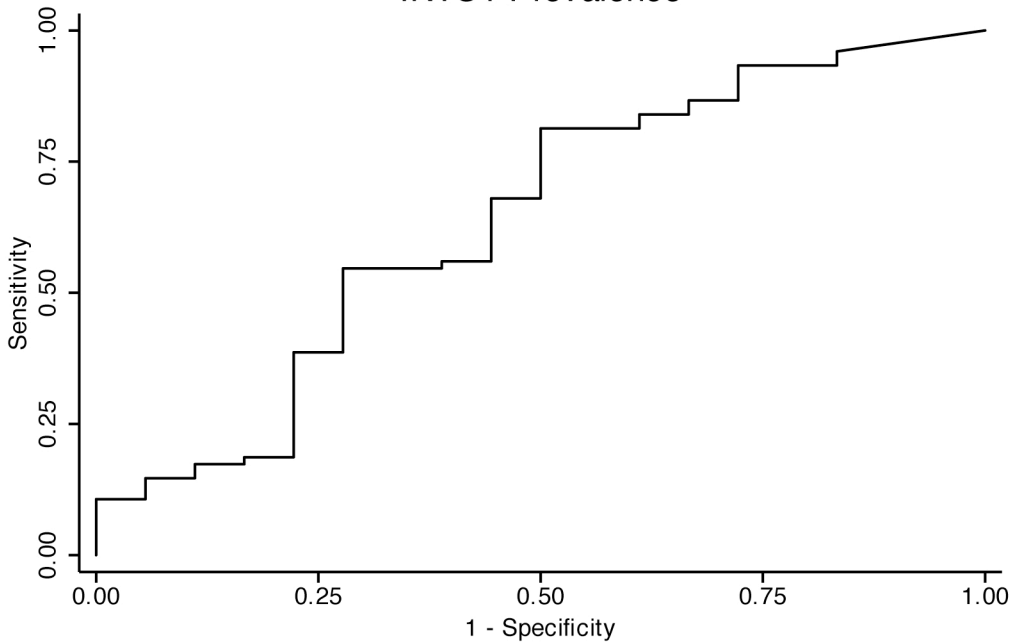

Area under ROC curve = 0.64

# ZNF516 Prevalence

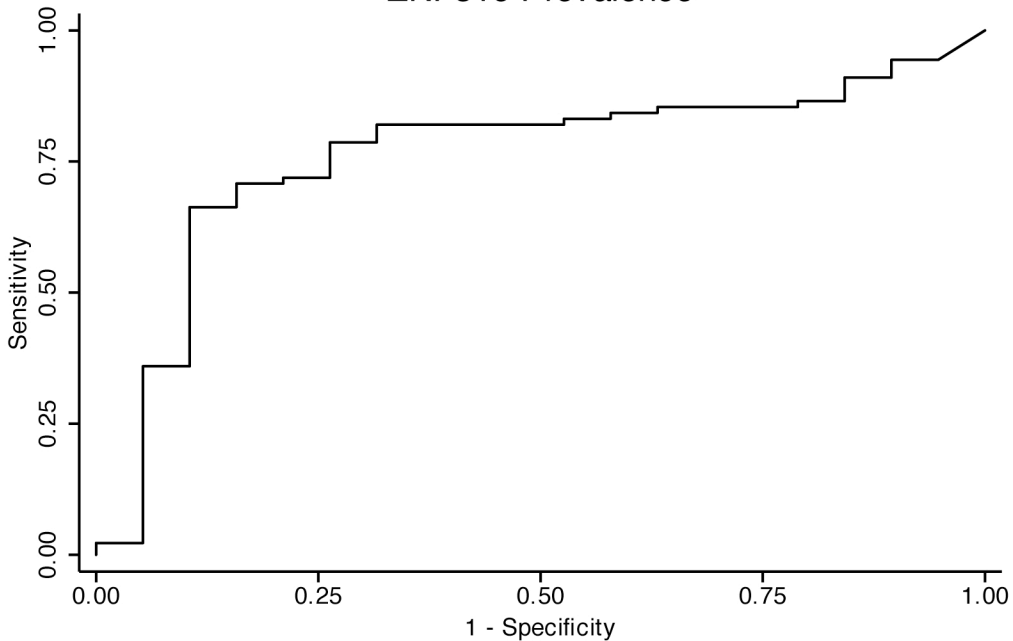

Area under ROC curve = 0.76

# ZNF516 FKBP6 Prevalence screen panel

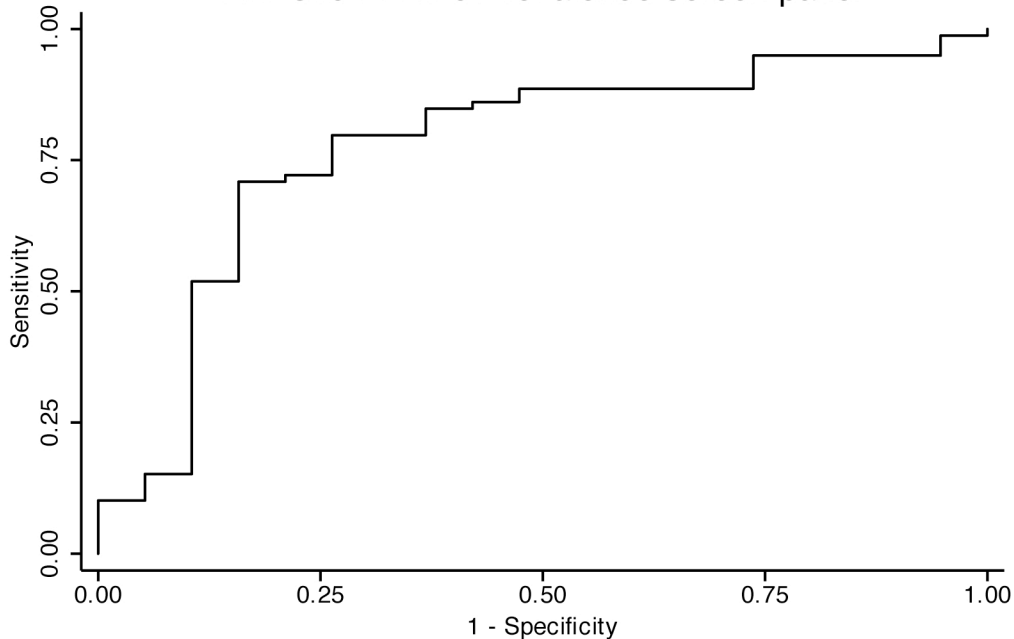

Area under ROC curve = 0.78

## FKBP6

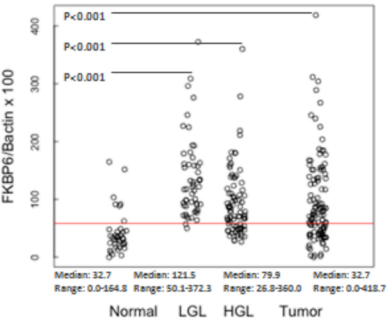

## INTS1

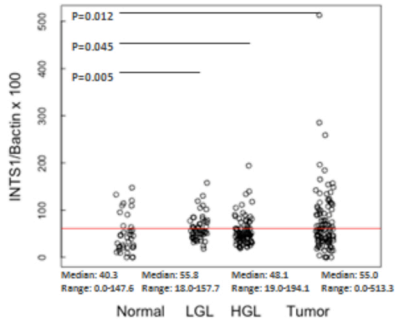

## ZNF516

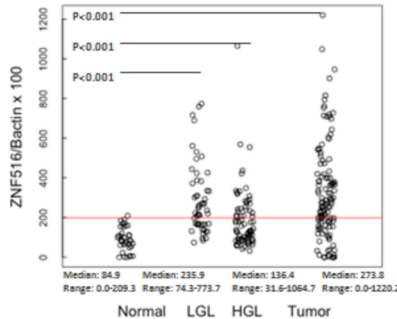

## Supplementary Figures Legends

Supplementary Figure 1a. Subset of statistically significant ( $p < 0.01$ ;  $q < 0.05$ ) methylated probes with more than a two-fold change differential methylation value when comparing normal to tumor samples ordered from the beginning of the p arm to the end of the q arm in odd numbered chromosomes from 13-19.

Supplementary Figure 1b: Subset of statistically significant ( $p < 0.01$ ;  $q < 0.05$ ) methylated probes with more than a two-fold change differential methylation value when comparing normal to tumor samples ordered from the beginning of the p arm to the end of the q arm in chromosomes 20, 21, 22 and in the X chromosome.

Supplementary Figure 2a-e. Representative bisulfite sequencing results for *FKBP6*, *GGTLA4*, *INTS1*, *SAP130*, and *ZNF516* for samples that were hybridized to the methylation arrays. Methylated (black dots) and unmethylated (white dots) cytosines in PCR fragments amplified with bisulfite sequencing primers. The promoter region around the TSS site of these five genes (A) and the graphical representations of the bisulfite sequencing results (B), tested in the Discovery cohort are shown in Supplementary Figures 2a) *FKBP6*; Fig. 2b) *GGTLA4*; Fig. 2c) *INTS1*; Fig. 2d) *SAP130*; and Fig. 2e) *ZNF516*.

Supplementary Figure 3a). MSP results in the samples that were hybridized to the microarrays. M: Methylated, U: Unmethylated, C+ 100% Methylated Bisulfite treated DNA (Zymo Research), C- PCR product without DNA (blank). (708-710 Normals, 57-481 tumor)

Supplementary Figure 3b). Representative methylation specific PCR (MSP) results for A: B-actin (268 bp), B:GGTLA4 (M183, U185 bp), C: FKBP6 (M137, U135 bp), D: ZNF516 (M 241, U 242 bp), E: INTS1 (M143, U147 bp) and F: SAP130 (M189, U192 bp) by histology type in normal, LSIL, HSIL and cervical cancer samples. M: Methylated, U: Unmethylated.

Supplementary Figure 3c). Bar charts of percentage of methylation by MSP across normal (n=25), LSIL (n=66), HSIL (n=91), and cervical SCC (n=39) samples. Methylated is presence of a band in the methylated MSP. Unmethylated is presence of a band in the unmethylated MSP. In the normal samples the genes FKBP6 (12%), INTS1 (20%) and, SAP130 (12%) showed less methylation than GGTLA4 and ZNF516 (40% and 44% respectively). In the LSIL the frequency of methylation increases for all the genes, GGTLA4 (59%), FKBP6 (85%), ZNF516 (100%), INTS1 (100%) and SAP130 (62%). In the HSIL the methylation frequency varied. Only GGTLA4, and SAP130 have increases in the rates of methylation (97% and 74% respectively), while FKBP6 (65%), ZNF516 (99%) and INTS1 (98%) decreased. Finally, in the cancer samples, the genes GGTLA4, FKBP6 and SAP130 show increases in methylation frequency from 97% to 100%. For GGTLA4, and SAP130 the methylation frequency increases with the severity of the cervical lesion.

Supplementary Figure 4a-g. Receiver Operator Characteristics (ROC) curves and Area Under the Curve (AUC) results in the Validation cohort for Fig. 4a) FKBP6; Fig. 4b) INTS1; and Fig. 4c) ZNF516. ROC curves and AUC results in the Prevalence cohort for Fig. 4d) FKBP6; Fig. 4e) INTS1; and Fig. 4f) ZNF516. ROC curves and AUC results in the Validation and Prevalence cohorts for Fig. 4g) a combined panel of FKBP6 and ZNF516.

Supplementary Figure 5. Scatterplots of qMSP analysis of *FKBP6*, *INTS1*, and *ZNF516* in all normal (n=37), LSIL (n=53), HSIL (n=84), and cancer (n=120) samples. The relative level of methylated DNA for each gene in each sample was determined as a ratio of qMSP for the amplified gene to  $\beta$ -actin. Red line denotes cut-off value.
